# Supplementary material for: In situ solvothermal syntheses of a heteronuclear copper(I)-alkaline metallic tetrazole-based coordination polymer
Source: Royal Society of Chemistry journal article supplement (doi:10.1039/b910418f), 2009-09-07
Supplement: b910418f.pdf [file b910418f.pdf]

## In situ solvothermal synthesis of heteronuclear Copper(I)-Alkaline metals tetrazole-based coordination polymers

Biao Liu, Yong-Cai Qiu, Guo Peng, Hong Deng,\*

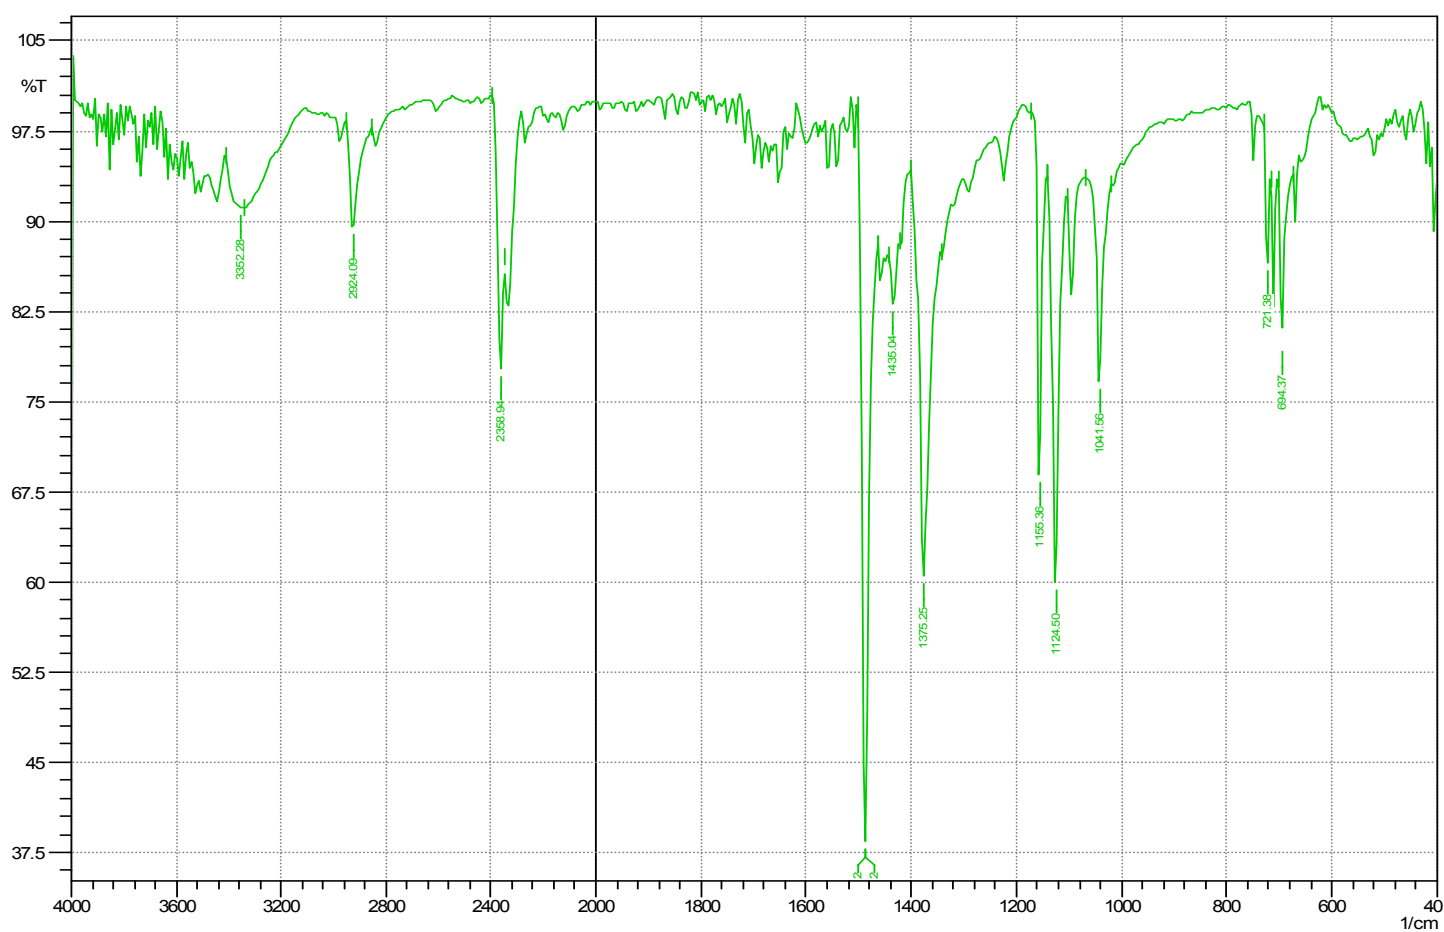

**Figure. S1** IR spectra of compound **1**. IR (KBr,  $\text{cm}^{-1}$ ): 3352(w), 2924(w), 2358(m), 1500(s), 1385(s), 1156(s), 1245(s), 1041(m), 721(w), 694(m)

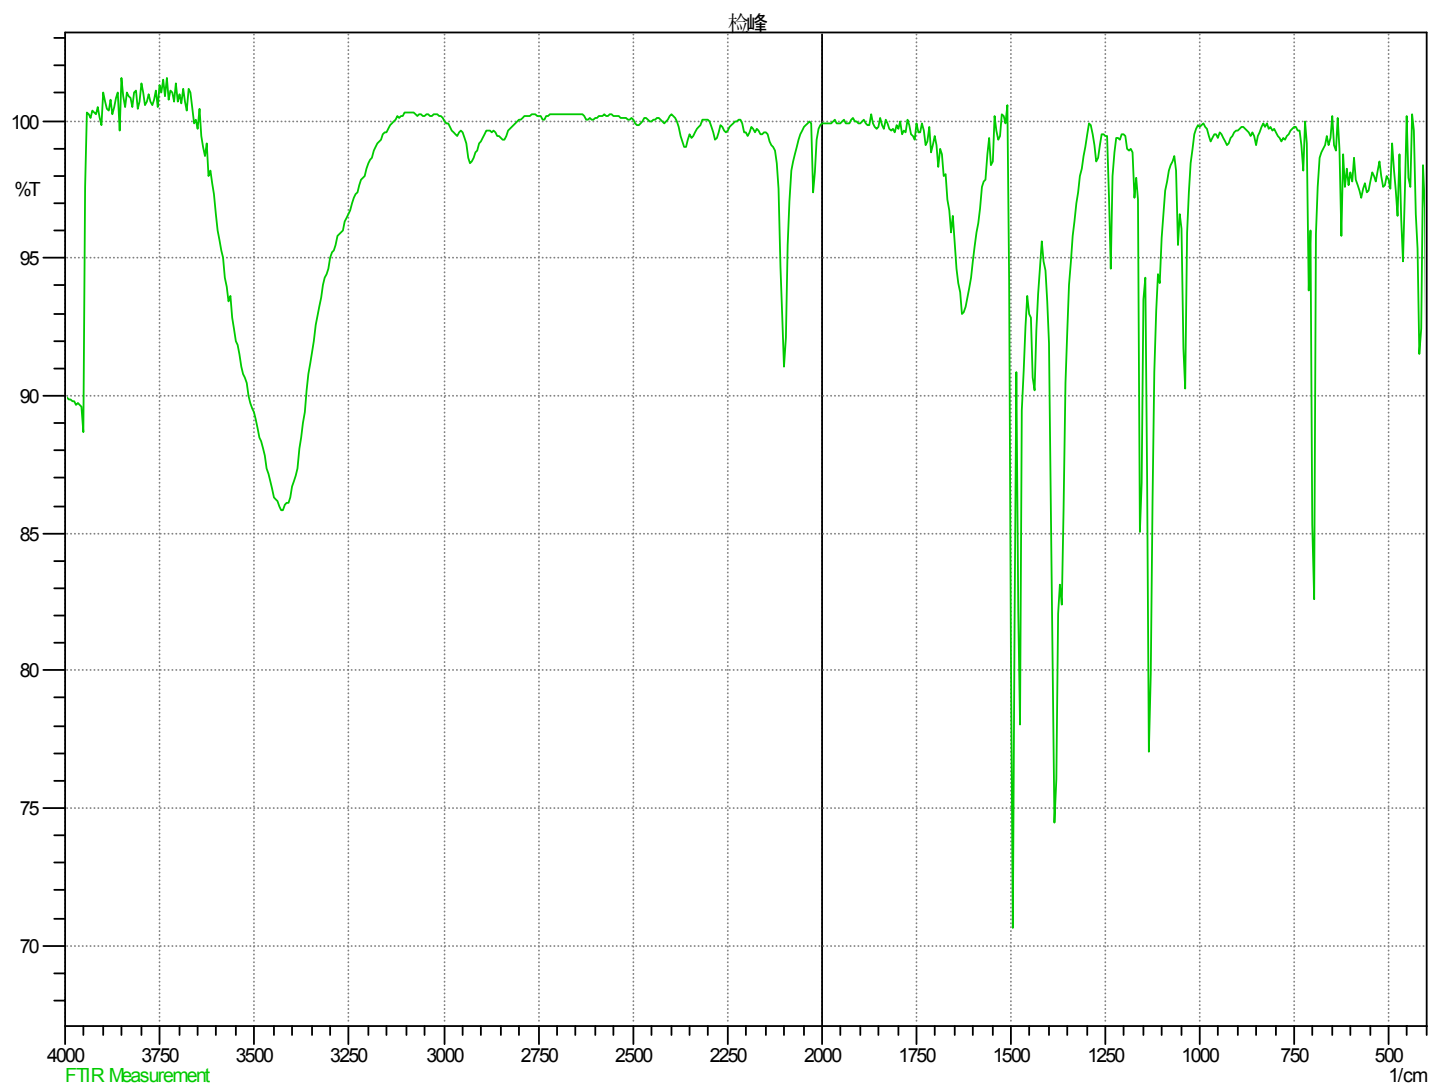

**Figure. S2** IR spectra of compound **2**. IR (KBr,  $\text{cm}^{-1}$ ): 3423(s), 2948(w) 2100(m), 1620(s), 1490(s), 1384(s), 1153(m), 1132(s), 1039(w), 702(s)

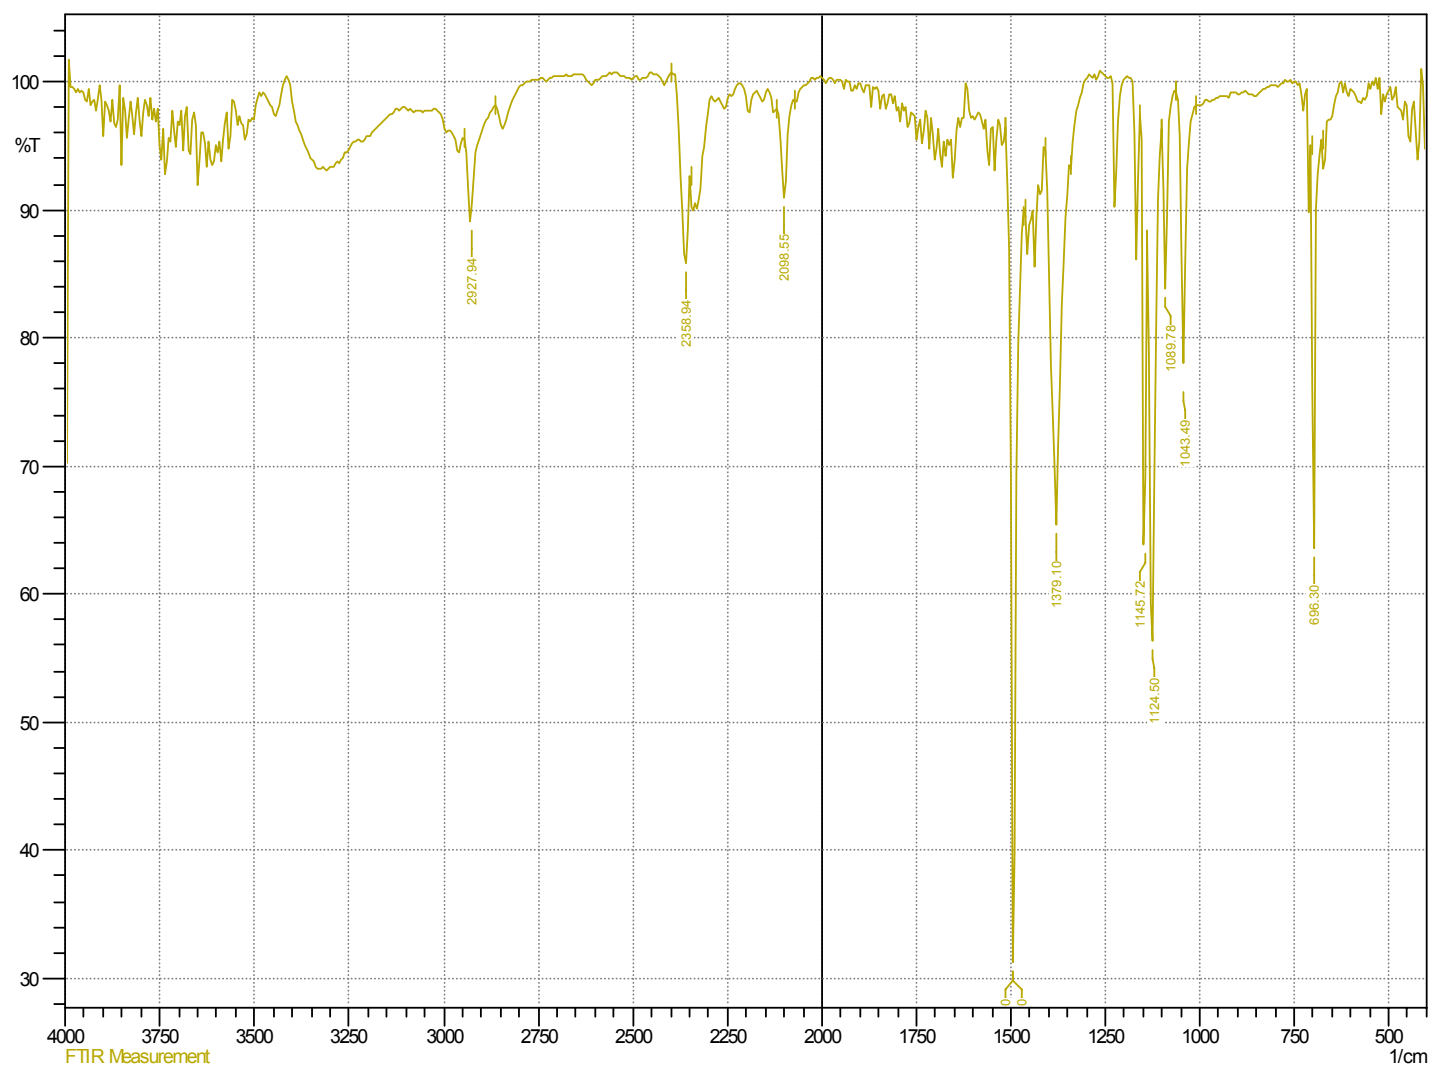

**Figure. S3** IR spectra of compound **3**. (KBr,  $\text{cm}^{-1}$ ): 3339(w), 2928(w), 2338(m), 2066(s), 1500(s), 1389(s), 1145(s), 1124(s), 1043(m), 696(s)

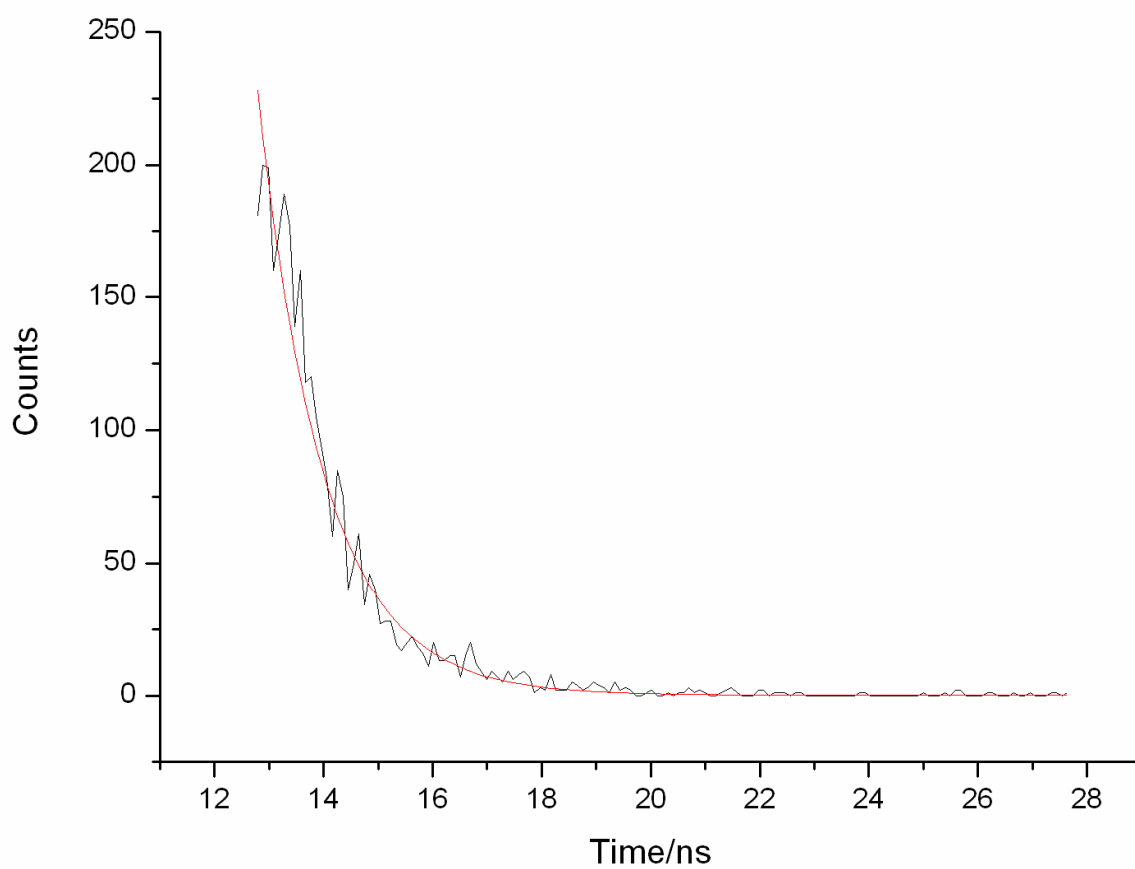

**Figure. S4** Fluorescence decay curve of complex **1** and  $\tau = 0.96$  ns {Fit= $A+B(e^{-t/\tau})$ }.

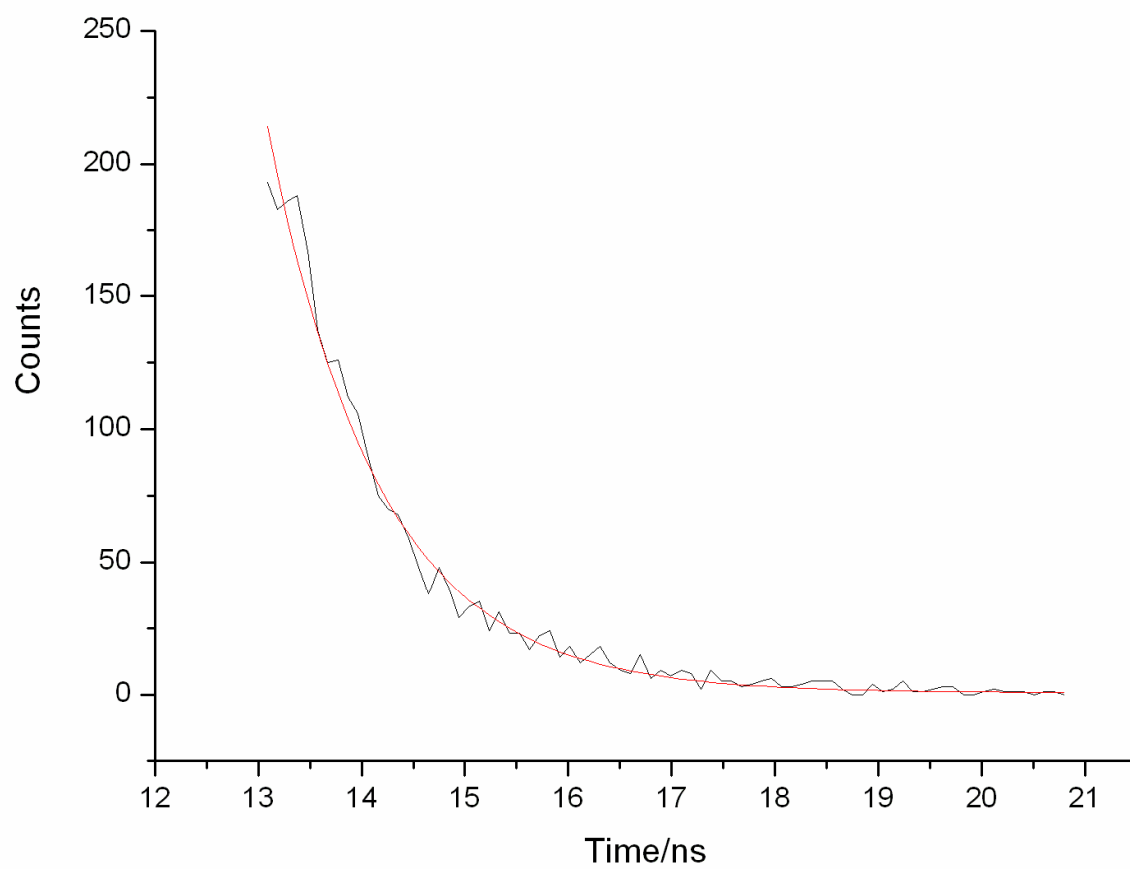

**Figure. S5** Fluorescence decay curve of complex **2** and  $\tau = 1.02$  ns {Fit= $A+B(e^{-t/\tau})$ }.

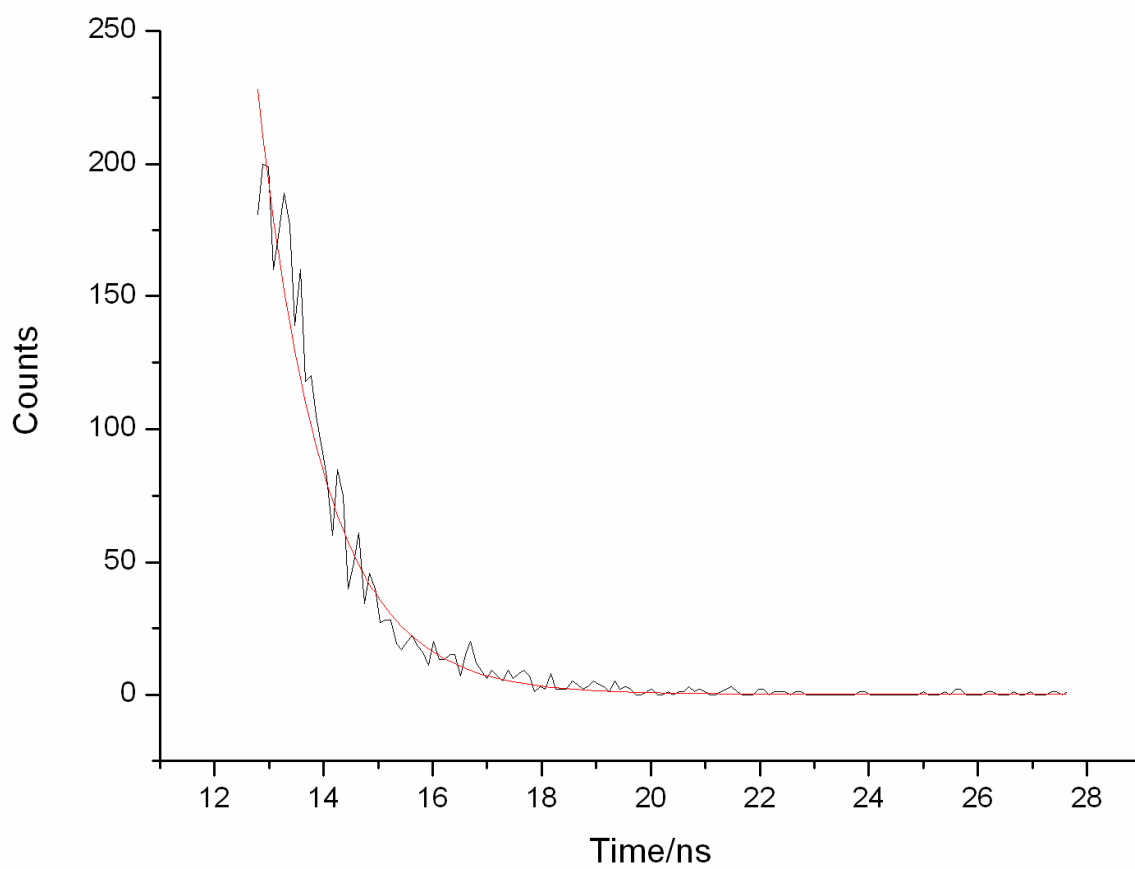

**Figure. S6** Fluorescence decay curve of complex **3** and  $\tau = 1.12$  ns {Fit= $A+B(e^{-t/\tau})$ }.
